# Supplementary material for: Enhancing Evidence-Based Practice Competence and Professional Skills Using Infographics as a Pedagogical Strategy in Health Science Students: Insights from the InfoHealth Project
Source: MDPI journal article supplement (doi:10.3390/ejihpe14040060), 2024-04-02
Supplement: s1 [file s1]

File S1. Examples of Physiotherapy students.

# -Como tratar el linfedema-

## Drenaje linfático manual

EL SISTEMA LINFÁTICO ESTÁ FORMADO POR UNA RED DE CANALES PARALELOS AL SISTEMA VENOSO. LE AYUDA A RECOGER EL LÍQUIDO QUE SE ESCAPA AL INTERCAMBIO ENTRE LAS VENAS Y LAS ARTERIAS. ESTE LÍQUIDO, JUNTO CON GRASAS, PROTEÍNAS GRANDES, INCLUSO BACTERIAS...ES LO QUE FORMA LA LINFÁ. ÉSTOS CANALES O VASOS LINFÁTICOS HACEN QUE LA LINFÁ VAYA DESDE LAS EXTREMIDADES Y LA CABEZA HACIA EL CORAZÓN, DONDE SE JUNTA DE NUEVO CON LA SANGRE VENOSA.

**Drenaje linfático manual**

EL DLM ES UN MASAJE SUAVE QUE AYUDA A ACTIVAR EL SISTEMA LINFÁTICO DE MANERA NATURAL PARA REDUCIR EL EXCESO DE LINFÁ EN EL LINFEDEMA.

1 Existen unos filamentos que se unen tanto a la piel como a los vasos linfáticos.

2 Al masajear suavemente la piel, tiramos de esos filamentos, tensándolos.

3 Esto hace que las células se abran, y la linfa entre dentro de los vasos linfáticos.

¡Si presionamos en exceso, esto no ocurrirá!

Tras cirucías, QUIMIOTERAPIA O RADIOTERAPIA PARA EL TRATAMIENTO DEL CÁNCER DE MAMA, PARTE DE LOS VASOS LINFÁTICOS SE DAÑAN. POR ELLO, LA LINFÁ NO TIENE SUFICIENTES CANALES POR LOS QUE CIRCULAR, Y SE QUEDA ACUMULADA, PROVOCANDO LO QUE CONOCEMOS COMO LINFEDEMA.

**Terapia descongestiva compleja**

EL DLM SUELE USARSE COMO PARTE DE ESTA TERAPIA, JUNTO A...

**COMPRESIÓN**

Hace que los músculos estén presionados contra los vasos linfáticos y la linfa no pueda volver a salir.

**EJERCICIOS**

Cuando se contraen los músculos, presionan de forma intermitente los vasos linfáticos ayudando a bombear la linfa.

Hay que realizarlo siempre con la compresión

**CUIDADO DE LA PIEL**

Como la piel se estira más de lo habitual, hay más riesgo de que se rompa con mínimos golpes y se infecte, por lo que debemos cuidarla en especial.

¡Debe ser realizado por un fisioterapeuta!

¿Quieres aprender a hacer un autodrenaje linfático manual?

## CONOCE LA ARTROSIS

Dolor mecánico, que mejora con el reposo y aumenta con el movimiento.

Presencia frecuente de periodos breves de rigidez o tras el reposo.

Las articulaciones con un exceso de carga o movilidad son las más afectadas (caderas, rodillas, columna cervical y lumbar, articulaciones de la mano).

Manifestaciones específicas articulares características de la artrosis: Nódulos de Heberden

Impotencia funcional, inestabilidad articular, limitación de la movilidad.

Atrofia de la musculatura y deformidad en las zonas afectadas

Se pueden escuchar crepitaciones

En radiografía podemos observar: Esclerosis del hueso subcondral, formación de osteofitos, disminución de la interlínea articular y en algunos casos, formación de quistes.

Derrames ocasionales y periodos variables de inflamación articular localizada.

¿Qué hacer?

Posible afectación del sentido de la posición articular en el espacio.

SCAN ME

Examples of Occupational Therapy students.

## Bebé prematuro y dificultades en el procesamiento sensorial

Un bebé prematuro es:  
un bebé nacido antes de 37 semanas de gestación o con un peso inferior a 2 500 gr

**RIESGO**  
sistema sensorial no completamente desarrollado

Disfunción del Procesamiento Sensorial o  
**Trastorno del Procesamiento Sensorial (TPS)**

Definición: Alteración en el desarrollo del juego, participación social, educación y autocuidado

TPS se puede especificar en 3 trastornos:

|                                                            |                                                             |
|------------------------------------------------------------|-------------------------------------------------------------|
| Trastorno de modulación sensorial (TMS)                    | Hipersensibilidad<br>Hiposensibilidad<br>Búsqueda sensorial |
| Trastorno de discriminación sensorial (TDS)                | Alteración a nivel motor, aprendizaje, lenguaje             |
| Trastorno motor basado en la integración sensorial (TMBIS) | Alteración de la postura y de la praxis                     |

**Unidad de Cuidados Intensivos Neonatales (UCIN)**

Muchos estímulos y más intensos que en el útero

El bebé está sometido a

- situación de estrés:  
Que le toquen mucho puede resultar más estresante que relajante
- cambios fisiológicos:  
Debido a la exposición a sonidos agudos (taquicardia, apnea, súbito aumento de la presión arterial, liberación de hormonas del estrés, dificultad de sueño,...)

**Se necesita un terapeuta ocupacional**  
ya que puede:

- Identificar los riesgos en la UCIN y modificar su ambiente
- Reconocer signos y síntomas del Trastorno del Procesamiento Sensorial en los bebés
- Educar a los padres sobre el TPS, incluso sus signos, síntomas, técnicas y enfoques para integrar en casa

Mitchell AW, Moore EM, Roberts FJ, Hachtel KW, Brown MS. Sensory Processing Disorder in Children Ages Birth-5 Years Born Prematurely: A Systematic Review. Am J Occup Ther. 2014;68(1):6901220030p1.

## TERAPIA OCUPACIONAL EN NIÑOS CON DIFICULTADES

**ESTE ES ALEJANDRO**

ALEJANDRO ES UN NIÑO DE 6 AÑOS CON TEA QUE TIENE DIFICULTADES EN LA INTERACCIÓN ENTRE IGUALES, CUMPLIMIENTO DE RUTINAS EN EL AULA, PROCESAMIENTO SENSORIAL Y CONDUCTAS EN CLASE.

LA PROFESORA Y LA TERAPEUTA CONSIGUIERON ENCONTRAR LA FORMA DE QUE ALEJANDRO PUDIERA MEJORAR.

**YOGA**

CON ESTRATEGIAS COMO:

- QUE LE AYUDÓ A MEJORAR LA AUTORREGULACIÓN.
- DISMINUYÓ SU EXCITABILIDAD.
- LE AYUDÓ EN EL CONTROL DE IMPULSOS.

**HISTORIAS SOCIALES**

- QUE LE AYUDARON A AUMENTAR SUS HABILIDADES SOCIALES.
- GRACIAS A ELLAS ADQUIRIÓ ROLES SOCIALES.
- FOMENTARON SU RESPETO POR LAS NORMAS.

**EN CONCLUSIÓN, PODEMOS VER QUE:**  
LA TERAPIA OCUPACIONAL, EN COOPERACIÓN CON LAS ESCUELAS, PROPORCIONA UNA MEJORA EN EL RENDIMIENTO Y LA PARTICIPACIÓN ESCOLAR.

Examples of Podiatry students.

# TENDINOPATÍA AQUILEA

## PREVENCIÓN

### ¿TENDINOPATÍA?

ES EL TRASTORNO TENDINOSO MÁS FRECUENTE QUE SE CONSIDERA EL DIAGNÓSTICO CLÍNICO DE DOLOR Y DISFUNCIÓN E HISTOPATOLÓGICAMENTE POR DETERIORO Y DEGENERACIÓN DEL TENDÓN.

### ¿COMO EVITARLA? → Prevención de los factores de riesgo:

| FACTORES INTRÍNSECOS                                                                                                                                                                                                                                                                                                                                                                                                                                                                                                                                                                      | FACTORES EXTRÍNSECOS                                                                                                                                                                                                                                                                                                                                                                                                                                                                                                               |
|-------------------------------------------------------------------------------------------------------------------------------------------------------------------------------------------------------------------------------------------------------------------------------------------------------------------------------------------------------------------------------------------------------------------------------------------------------------------------------------------------------------------------------------------------------------------------------------------|------------------------------------------------------------------------------------------------------------------------------------------------------------------------------------------------------------------------------------------------------------------------------------------------------------------------------------------------------------------------------------------------------------------------------------------------------------------------------------------------------------------------------------|
| <b>BIOMECÁNICA</b> <ul style="list-style-type: none"><li>PIE PLANO</li><li>PIE CAVO</li><li>DISMETRÍAS</li></ul>  <p>USA ORTESIS ADECUADAS</p>                                                                                                                                                                                                                                                                                                                                                           | <b>ERRORES AL ENTRENAR</b> <p>REALIZA EJERCICIOS ESPECÍFICOS</p> <ul style="list-style-type: none"><li>AL CALENTAR</li></ul>   <ul style="list-style-type: none"><li>AL ESTIRAR</li></ul>   |
| <b>FUERZA MUSCULAR INADECUADA</b> <p>MEJORA TU MUSCULATURA</p> <ul style="list-style-type: none"><li>SI HAY HIPERTONÍA:<ul style="list-style-type: none"><li>Técnicas inhibitorias</li><li>Técnicas miotensivas</li><li>Técnicas pasivas</li></ul></li><li>SI HAY HIPOTONIA<ul style="list-style-type: none"><li>Ejercicios isotónicos</li><li>Trabajo excéntrico</li><li>Trabajo propioceptivo</li></ul></li></ul> | <b>CALZADO INADECUADO</b> <p>EL CALZADO IDEAL:</p> <ul style="list-style-type: none"><li>Contrafuerte ancho, resistente y almohadillado</li><li>Suela amortiguadora con 3mm de grosor</li><li>Drop 10mm</li></ul>                                                                                                                                                                                                                               |
| <b>OBESIDAD</b> <p>Realizar descansos y ritmos de ejercicio correctos</p>  <p>Usa calzado adecuado</p>                                                                                                                                                                                                                                                                                                              | <b>FACTORES AMBIENTALES</b> <p>EVITA:</p> <ul style="list-style-type: none"><li>CAMBIOS BRUSCOS DE TEMPERATURA</li><li>SUPERFICIES DURAS</li></ul>                                                                                                                                                                                                           |
